# Supplementary material
Source: publisher figshare collection journal article supplement (https://acs.figshare.com/ndownloader/files/5677980)
Supplement: Supplementary file 1 [file 5677980]

 
data_12 
 
_audit_creation_method            SHELXL-97 
_chemical_name_systematic 
; 
 ? 
; 
_chemical_name_common             ? 
_chemical_melting_point           ? 
_chemical_formula_moiety          ? 
_chemical_formula_sum 
 'C13 H10 Co0.50 N5 S' 
_chemical_formula_weight          297.79 
 
loop_ 
 _atom_type_symbol 
 _atom_type_description 
 _atom_type_scat_dispersion_real 
 _atom_type_scat_dispersion_imag 
 _atom_type_scat_source 
 'C'  'C'   0.0033   0.0016 
 'International Tables Vol C Tables 4.2.6.8 and 6.1.1.4' 
 'H'  'H'   0.0000   0.0000 
 'International Tables Vol C Tables 4.2.6.8 and 6.1.1.4' 
 'N'  'N'   0.0061   0.0033 
 'International Tables Vol C Tables 4.2.6.8 and 6.1.1.4' 
 'S'  'S'   0.1246   0.1234 
 'International Tables Vol C Tables 4.2.6.8 and 6.1.1.4' 
 'Co'  'Co'   0.3494   0.9721 
 'International Tables Vol C Tables 4.2.6.8 and 6.1.1.4' 
 
_symmetry_cell_setting            orthorhombic 
_symmetry_space_group_name_H-M    Cmca 
 
loop_ 
 _symmetry_equiv_pos_as_xyz 
 'x, y, z' 
 '-x, -y+1/2, z+1/2' 
 '-x, y+1/2, -z+1/2' 
 'x, -y, -z' 
 'x+1/2, y+1/2, z' 
 '-x+1/2, -y+1, z+1/2' 
 '-x+1/2, y+1, -z+1/2' 
 'x+1/2, -y+1/2, -z' 
 '-x, -y, -z' 
 'x, y-1/2, -z-1/2' 
 'x, -y-1/2, z-1/2' 
 '-x, y, z' 
 '-x+1/2, -y+1/2, -z' 
 'x+1/2, y, -z-1/2' 
 'x+1/2, -y, z-1/2' 
 '-x+1/2, y+1/2, z' 
 
_cell_length_a                    17.8680(10) 
_cell_length_b                    18.6140(10) 
_cell_length_c                    7.7940(10) 
_cell_angle_alpha                 90.00 
_cell_angle_beta                  90.00 
_cell_angle_gamma                 90.00 
_cell_volume                      2592.2(4) 
_cell_formula_units_Z             8 
_cell_measurement_temperature     293(2) 
_cell_measurement_reflns_used     ? 
_cell_measurement_theta_min       ? 
_cell_measurement_theta_max       ? 
 
_exptl_crystal_description        ? 
_exptl_crystal_colour             pale pink 
_exptl_crystal_size_max           ? 
_exptl_crystal_size_mid           ? 
_exptl_crystal_size_min           ? 
_exptl_crystal_density_meas       ? 
_exptl_crystal_density_diffrn     1.526 
_exptl_crystal_density_method     'not measured' 
_exptl_crystal_F_000              1220 
_exptl_absorpt_coefficient_mu     0.861 
_exptl_absorpt_correction_type    ? 
_exptl_absorpt_correction_T_min   ? 
_exptl_absorpt_correction_T_max   ? 
_exptl_absorpt_process_details    ? 
 
_exptl_special_details 
; 
 ? 
; 
 
_diffrn_ambient_temperature       293(2) 
_diffrn_radiation_wavelength      0.71073 
_diffrn_radiation_type            MoK\a 
_diffrn_radiation_source          'fine-focus sealed tube' 
_diffrn_radiation_monochromator   graphite 
_diffrn_measurement_device_type   ? 
_diffrn_measurement_method        ? 
_diffrn_detector_area_resol_mean  ? 
_diffrn_standards_number          ? 
_diffrn_standards_interval_count  ? 
_diffrn_standards_interval_time   ? 
_diffrn_standards_decay_%         ? 
_diffrn_reflns_number             4690 
_diffrn_reflns_av_R_equivalents   0.0729 
_diffrn_reflns_av_sigmaI/netI     0.0989 
_diffrn_reflns_limit_h_min        -23 
_diffrn_reflns_limit_h_max        23 
_diffrn_reflns_limit_k_min        -23 
_diffrn_reflns_limit_k_max        19 
_diffrn_reflns_limit_l_min        -9 
_diffrn_reflns_limit_l_max        9 
_diffrn_reflns_theta_min          2.19 
_diffrn_reflns_theta_max          27.49 
_reflns_number_total              1482 
_reflns_number_gt                 762 
_reflns_threshold_expression      >2sigma(I) 
 
_computing_data_collection        ? 
_computing_cell_refinement        ? 
_computing_data_reduction         ? 
_computing_structure_solution     'SHELXS-97 (Sheldrick, 1990)' 
_computing_structure_refinement   'SHELXL-97 (Sheldrick, 1997)' 
_computing_molecular_graphics     ? 
_computing_publication_material   ? 
 
_refine_special_details 
; 
 Refinement of F^2^ against ALL reflections.  The weighted R-factor wR and 
 goodness of fit S are based on F^2^, conventional R-factors R are based 
 on F, with F set to zero for negative F^2^. The threshold expression of 
 F^2^ > 2sigma(F^2^) is used only for calculating R-factors(gt) etc. and is 
 not relevant to the choice of reflections for refinement.  R-factors based 
 on F^2^ are statistically about twice as large as those based on F, and R- 
 factors based on ALL data will be even larger. 
; 
 
_refine_ls_structure_factor_coef  Fsqd  
_refine_ls_matrix_type            full 
_refine_ls_weighting_scheme       calc  
_refine_ls_weighting_details 
 'calc w=1/[\s^2^(Fo^2^)+(0.0989P)^2^+0.0000P] where P=(Fo^2^+2Fc^2^)/3' 
_atom_sites_solution_primary      direct 
_atom_sites_solution_secondary    difmap 
_atom_sites_solution_hydrogens    geom 
_refine_ls_hydrogen_treatment     mixed 
_refine_ls_extinction_method      none 
_refine_ls_extinction_coef        ? 
_refine_ls_number_reflns          1482 
_refine_ls_number_parameters      95 
_refine_ls_number_restraints      0 
_refine_ls_R_factor_all           0.1058 
_refine_ls_R_factor_gt            0.0430 
_refine_ls_wR_factor_ref          0.1798 
_refine_ls_wR_factor_gt           0.1143 
_refine_ls_goodness_of_fit_ref    1.005 
_refine_ls_restrained_S_all       1.005 
_refine_ls_shift/su_max           0.000 
_refine_ls_shift/su_mean          0.000 
 
loop_ 
 _atom_site_label 
 _atom_site_type_symbol 
 _atom_site_fract_x 
 _atom_site_fract_y 
 _atom_site_fract_z 
 _atom_site_U_iso_or_equiv 
 _atom_site_adp_type 
 _atom_site_occupancy 
 _atom_site_symmetry_multiplicity 
 _atom_site_calc_flag 
 _atom_site_refinement_flags 
 _atom_site_disorder_assembly 
 _atom_site_disorder_group 
Co Co 0.0000 0.0000 0.0000 0.0334(4) Uani 1 4 d S . . 
S S 0.0000 -0.17548(12) 0.4713(2) 0.0640(7) Uani 1 2 d S . . 
N1 N 0.16946(17) 0.1318(2) 0.2382(4) 0.0388(9) Uani 1 1 d . . . 
N2 N 0.08504(17) 0.05262(19) 0.1501(4) 0.0367(9) Uani 1 1 d . . . 
N3 N 0.0000 -0.0901(3) 0.1779(6) 0.0430(14) Uani 1 2 d S . . 
C1 C 0.2121(3) 0.3252(3) 0.2438(7) 0.0563(14) Uani 1 1 d . . . 
H1 H 0.1861 0.3685 0.2378 0.068 Uiso 1 1 calc R . . 
C2 C 0.1740(3) 0.2620(3) 0.2403(5) 0.0519(14) Uani 1 1 d . . . 
H2 H 0.1221 0.2624 0.2344 0.062 Uiso 1 1 calc R . . 
C3 C 0.2113(2) 0.1973(2) 0.2455(5) 0.0379(11) Uani 1 1 d . . . 
C4 C 0.1145(2) 0.1172(3) 0.1240(5) 0.0427(12) Uani 1 1 d . . . 
H4 H 0.0993 0.1485 0.0379 0.051 Uiso 1 1 calc R . . 
C5 C 0.1747(2) 0.0732(3) 0.3440(6) 0.0462(12) Uani 1 1 d . . . 
H5 H 0.2074 0.0675 0.4358 0.055 Uiso 1 1 calc R . . 
C6 C 0.1226(2) 0.0247(3) 0.2890(6) 0.0451(12) Uani 1 1 d . . . 
H6 H 0.1140 -0.0201 0.3378 0.054 Uiso 1 1 calc R . . 
C7 C 0.0000 -0.1263(4) 0.2986(8) 0.0385(15) Uani 1 2 d S . . 
 
loop_ 
 _atom_site_aniso_label 
 _atom_site_aniso_U_11 
 _atom_site_aniso_U_22 
 _atom_site_aniso_U_33 
 _atom_site_aniso_U_23 
 _atom_site_aniso_U_13 
 _atom_site_aniso_U_12 
Co 0.0264(6) 0.0358(8) 0.0378(7) 0.0022(6) 0.000 0.000 
S 0.0564(12) 0.0757(18) 0.0598(13) 0.0251(10) 0.000 0.000 
N1 0.0314(19) 0.039(3) 0.046(2) 0.004(2) -0.0058(16) -0.0023(18) 
N2 0.0317(19) 0.038(2) 0.041(2) -0.0007(18) -0.0053(15) 0.0001(17) 
N3 0.037(3) 0.042(4) 0.050(3) 0.006(3) 0.000 0.000 
C1 0.072(3) 0.035(3) 0.062(3) 0.003(3) -0.001(3) 0.009(2) 
C2 0.048(3) 0.047(4) 0.061(3) 0.003(3) -0.003(2) 0.008(2) 
C3 0.037(2) 0.036(3) 0.041(3) 0.004(2) -0.0043(19) -0.001(2) 
C4 0.036(2) 0.047(3) 0.045(3) 0.007(2) -0.0052(19) 0.000(2) 
C5 0.046(3) 0.047(3) 0.046(3) 0.007(2) -0.011(2) -0.002(2) 
C6 0.044(3) 0.039(3) 0.052(3) 0.006(2) -0.008(2) -0.004(2) 
C7 0.027(3) 0.039(4) 0.049(4) -0.001(3) 0.000 0.000 
 
_geom_special_details 
; 
 All esds (except the esd in the dihedral angle between two l.s. planes) 
 are estimated using the full covariance matrix.  The cell esds are taken 
 into account individually in the estimation of esds in distances, angles 
 and torsion angles; correlations between esds in cell parameters are only 
 used when they are defined by crystal symmetry.  An approximate (isotropic) 
 treatment of cell esds is used for estimating esds involving l.s. planes. 
; 
 
loop_ 
 _geom_bond_atom_site_label_1 
 _geom_bond_atom_site_label_2 
 _geom_bond_distance 
 _geom_bond_site_symmetry_2 
 _geom_bond_publ_flag 
Co N2 2.153(3) 9 ? 
Co N2 2.153(3) . ? 
Co N2 2.153(3) 4 ? 
Co N2 2.153(3) 12 ? 
Co N3 2.177(5) . ? 
Co N3 2.177(5) 9 ? 
S C7 1.629(7) . ? 
N1 C4 1.352(5) . ? 
N1 C5 1.371(5) . ? 
N1 C3 1.431(5) . ? 
N2 C4 1.328(5) . ? 
N2 C6 1.376(5) . ? 
N3 C7 1.156(7) . ? 
C1 C1 1.360(9) 7_545 ? 
C1 C2 1.360(6) . ? 
C2 C3 1.376(6) . ? 
C3 C3 1.385(8) 7_545 ? 
C5 C6 1.364(6) . ? 
 
loop_ 
 _geom_angle_atom_site_label_1 
 _geom_angle_atom_site_label_2 
 _geom_angle_atom_site_label_3 
 _geom_angle 
 _geom_angle_site_symmetry_1 
 _geom_angle_site_symmetry_3 
 _geom_angle_publ_flag 
N2 Co N2 180.0(2) 9 . ? 
N2 Co N2 89.76(17) 9 4 ? 
N2 Co N2 90.24(17) . 4 ? 
N2 Co N2 90.24(17) 9 12 ? 
N2 Co N2 89.76(17) . 12 ? 
N2 Co N2 180.0(2) 4 12 ? 
N2 Co N3 89.74(14) 9 . ? 
N2 Co N3 90.26(14) . . ? 
N2 Co N3 89.74(14) 4 . ? 
N2 Co N3 90.26(14) 12 . ? 
N2 Co N3 90.26(14) 9 9 ? 
N2 Co N3 89.74(14) . 9 ? 
N2 Co N3 90.26(14) 4 9 ? 
N2 Co N3 89.74(14) 12 9 ? 
N3 Co N3 180.00(19) . 9 ? 
C4 N1 C5 106.6(4) . . ? 
C4 N1 C3 125.2(4) . . ? 
C5 N1 C3 128.2(3) . . ? 
C4 N2 C6 105.6(4) . . ? 
C4 N2 Co 127.5(3) . . ? 
C6 N2 Co 126.9(3) . . ? 
C7 N3 Co 165.1(5) . . ? 
C1 C1 C2 120.0(3) 7_545 . ? 
C1 C2 C3 121.0(5) . . ? 
C2 C3 C3 119.0(3) . 7_545 ? 
C2 C3 N1 119.4(4) . . ? 
C3 C3 N1 121.6(2) 7_545 . ? 
N2 C4 N1 111.6(4) . . ? 
C6 C5 N1 106.9(4) . . ? 
C5 C6 N2 109.3(4) . . ? 
N3 C7 S 178.7(6) . . ? 
 
_diffrn_measured_fraction_theta_max    0.960 
_diffrn_reflns_theta_full              27.49 
_diffrn_measured_fraction_theta_full   0.960 
_refine_diff_density_max    0.563 
_refine_diff_density_min   -0.584 
_refine_diff_density_rms    0.154 
